# Supplementary material
Source: publisher figshare collection journal article supplement (https://geolsoc.figshare.com/articles/dataset/_/3453305)
Supplement: Supplementary file 1 [file 1]

| Run ID       | Size range<br>( $\mu\text{m}$ ) | $^{40}\text{Ar} \pm \sigma$ (nA)                        | $^{39}\text{Ar} \pm \sigma$ (nA) | $^{38}\text{Ar} \pm \sigma$ (nA) | $^{37}\text{Ar} \pm \sigma$ (nA) | $^{36}\text{Ar} \pm \sigma$ (nA) | $^{40}\text{Ar}^* \pm \sigma$ (%) | $^{40}\text{Ar}^*/^{39}\text{Ar}_K \pm \sigma$ | Age $\pm \sigma$ |  |
|--------------|---------------------------------|---------------------------------------------------------|----------------------------------|----------------------------------|----------------------------------|----------------------------------|-----------------------------------|------------------------------------------------|------------------|--|
| Total fusion |                                 | $J=0.002652 \pm 0.000002 \quad D=1.005081 \pm 0.002207$ |                                  |                                  |                                  |                                  |                                   |                                                |                  |  |
| 58304-01     | FCp 150                         | 1.507598 0.004122                                       | 0.2427366 0.0005443              | 0.0030678 0.0000485              | 0.708643 0.0098908               | 0.000457 0.0000264               | 94.79265 0.6454118                | 5.8998 0.0424246                               | 28.01 $\pm$ 0.20 |  |
| 58304-02     | FCp 150                         | 3.256404 0.00493                                        | 0.5274841 0.001019               | 0.0064852 0.0000537              | 1.50981 0.0101883                | 0.0009235 0.0000268              | 95.31809 0.3247827                | 5.896561 0.0266885                             | 28.00 $\pm$ 0.13 |  |
| 58304-03     | FCp 150                         | 2.380609 0.004675                                       | 0.3869552 0.0007157              | 0.0048924 0.000052               | 0.8780944 0.0094635              | 0.0006075 0.0000268              | 95.40219 0.4333773                | 5.878736 0.0308292                             | 27.91 $\pm$ 0.15 |  |
| 58305-01     | FCp 150-125                     | 3.500273 0.005428                                       | 0.5578683 0.0010185              | 0.0069368 0.0000581              | 1.374419 0.0127459               | 0.0010532 0.0000273              | 94.2408 0.3177709                 | 5.923422 0.0266502                             | 28.12 $\pm$ 0.13 |  |
| 58305-02     | FCp 150-125                     | 3.014086 0.00472                                        | 0.4924384 0.0010184              | 0.0059424 0.0000546              | 1.248857 0.0109378               | 0.0007866 0.0000264              | 95.59264 0.3413009                | 5.861575 0.0273955                             | 27.83 $\pm$ 0.13 |  |
| 58305-03     | FCp 150-125                     | 3.056988 0.004699                                       | 0.4951279 0.0009493              | 0.0061938 0.0000599              | 1.285251 0.0107662               | 0.000789 0.0000268               | 95.72742 0.3391918                | 5.921327 0.0271696                             | 28.11 $\pm$ 0.13 |  |
| 58306-01     | FCp 125-85                      | 11.67937 0.009271                                       | 1.800674 0.0017127               | 0.0228255 0.0001033              | 4.735646 0.0202706               | 0.0049491 0.0000332              | 90.71244 0.1401973                | 5.894831 0.0210067                             | 27.99 $\pm$ 0.10 |  |
| 58306-02     | FCp 125-85                      | 11.24501 0.009361                                       | 1.741551 0.0020117               | 0.0221801 0.0000985              | 4.449167 0.01696                 | 0.0045778 0.0000332              | 91.12641 0.1461458                | 5.894715 0.021234                              | 27.99 $\pm$ 0.10 |  |
| 58306-03     | FCp 125-85                      | 11.35895 0.007599                                       | 1.787261 0.0017125               | 0.0225245 0.0000956              | 4.618873 0.0219575               | 0.0041007 0.0000354              | 92.57576 0.133617                 | 5.894561 0.0198926                             | 27.99 $\pm$ 0.09 |  |
| 58306-04     | FCp 125-85                      | 12.62878 0.012414                                       | 1.950442 0.0021113               | 0.0241851 0.000113               | 4.833088 0.0168245               | 0.0050941 0.0000339              | 91.1323 0.1583717                 | 5.91113 0.0212832                              | 28.07 $\pm$ 0.10 |  |
| 58307-01     | FCp 85-74                       | 11.62094 0.017295                                       | 1.739054 0.0026108               | 0.0216988 0.0000966              | 4.475891 0.0237008               | 0.0056938 0.0000347              | 88.59286 0.2215165                | 5.931029 0.0250811                             | 28.16 $\pm$ 0.12 |  |
| 58307-02     | FCp 85-74                       | 11.71556 0.017296                                       | 1.771144 0.0031107               | 0.0221839 0.000113               | 4.292046 0.0220176               | 0.0054073 0.0000347              | 89.28266 0.2201597                | 5.916015 0.0251471                             | 28.09 $\pm$ 0.12 |  |
| 58307-03     | FCp 85-74                       | 7.739379 0.013387                                       | 1.135713 0.0017121               | 0.0143881 0.0000889              | 2.871185 0.0163761               | 0.00427 0.0000326                | 86.65472 0.2644142                | 5.915869 0.0275779                             | 28.09 $\pm$ 0.13 |  |
| 58307-04     | FCp 85-74                       | 11.33162 0.019268                                       | 1.700052 0.0029106               | 0.0212787 0.0001033              | 4.236056 0.022055                | 0.0055399 0.0000376              | 88.53421 0.2514061                | 5.911757 0.0262733                             | 28.07 $\pm$ 0.12 |  |
| 58308-01     | FCp 74-63                       | 11.5563 0.021243                                        | 1.763176 0.0033107               | 0.0218475 0.000113               | 4.251132 0.0237659               | 0.0048482 0.0000347              | 90.53633 0.2674912                | 5.944213 0.0259691                             | 28.22 $\pm$ 0.12 |  |
| 58308-02     | FCp 74-63                       | 11.28857 0.020256                                       | 1.73416 0.0032107                | 0.0214495 0.0001326              | 4.174682 0.02209                 | 0.0045432 0.0000347              | 91.05633 0.2631491                | 5.937543 0.0254814                             | 28.19 $\pm$ 0.12 |  |
| 58308-03     | FCp 74-63                       | 11.4072 0.025205                                        | 1.757258 0.003711                | 0.0212545 0.000113               | 4.239491 0.0221006               | 0.0047122 0.0000339              | 90.75613 0.3155746                | 5.901571 0.0275332                             | 28.02 $\pm$ 0.13 |  |
| 58308-04     | FCp 74-63                       | 12.36486 0.022233                                       | 1.898482 0.0035108               | 0.0230385 0.000113               | 4.592483 0.0238123               | 0.00508 0.0000354                | 90.8208 0.2612965                 | 5.92541 0.025473                               | 28.13 $\pm$ 0.12 |  |
|              |                                 | $J=0.002655 \pm 0.000004$                               |                                  |                                  |                                  |                                  |                                   |                                                |                  |  |
| 58315-01     | FCp 63-53                       | 10.21969 0.0105                                         | 1.604257 0.0020113               | 0.0200055 0.0000927              | 3.877116 0.0204514               | 0.0037078 0.0000312              | 92.3048 0.1702008                 | 5.890292 0.0211685                             | 27.99 $\pm$ 0.10 |  |
| 58315-02     | FCp 63-53                       | 10.90696 0.023221                                       | 1.698385 0.0033107               | 0.020695 0.0000918               | 4.055121 0.0204581               | 0.0040903 0.0000339              | 91.88275 0.3077481                | 5.910731 0.0263148                             | 28.09 $\pm$ 0.12 |  |
| 58315-03     | FCp 63-53                       | 9.089742 0.018281                                       | 1.418864 0.0031107               | 0.017319 0.0000966               | 3.387784 0.0187834               | 0.0032647 0.0000326              | 92.35867 0.2977551                | 5.926904 0.0266579                             | 28.16 $\pm$ 0.13 |  |
| 58316-01     | FCp 53-38 I                     | 14.27284 0.007163                                       | 2.153232 0.0020055               | 0.0272577 0.0001148              | 5.252925 0.0220498               | 0.006307 0.0000348               | 89.87748 0.1026484                | 5.967995 0.0210949                             | 28.36 $\pm$ 0.10 |  |
| 58316-02     | FCp 53-38 I                     | 11.89625 0.026194                                       | 1.761809 0.0040113               | 0.0216939 0.0001033              | 4.167537 0.0273247               | 0.0054262 0.0000361              | 89.31449 0.3131307                | 6.040984 0.0294361                             | 28.70 $\pm$ 0.14 |  |
| 58316-03     | FCp 53-38 I                     | 12.51579 0.02818                                        | 1.870515 0.0043116               | 0.0228809 0.0001326              | 4.384215 0.0221816               | 0.0055831 0.0000354              | 89.61088 0.3180844                | 6.005994 0.0292678                             | 28.54 $\pm$ 0.14 |  |
| 58316-04     | FCp 53-38 I                     | 12.83644 0.030167                                       | 1.893073 0.0046119               | 0.0233113 0.0001424              | 4.400956 0.0273462               | 0.0057837 0.0000354              | 89.41913 0.3302787                | 6.073361 0.0304346                             | 28.85 $\pm$ 0.14 |  |
| 58317-01     | FCp 53-38 II                    | 6.950943 0.02025                                        | 1.056559 0.0034109               | 0.0128516 0.0000927              | 2.429325 0.0188208               | 0.0029967 0.0000306              | 90.04658 0.4184701                | 5.93374 0.0347572                              | 28.19 $\pm$ 0.16 |  |
| 58317-02     | FCp 53-38 II                    | 13.30962 0.024209                                       | 2.000928 0.0039113               | 0.0246134 0.0001228              | 4.622938 0.0291183               | 0.0060663 0.0000361              | 89.30079 0.2608818                | 5.949837 0.0266891                             | 28.27 $\pm$ 0.13 |  |
| 58317-03     | FCp 53-38 II                    | 13.70362 0.029174                                       | 2.065599 0.0050125               | 0.0257347 0.0001424              | 4.800233 0.0308742               | 0.0064142 0.0000347              | 88.96167 0.29912                  | 5.911697 0.0290004                             | 28.09 $\pm$ 0.14 |  |
| 58317-04     | FCp 53-38 II                    | 10.47764 0.028187                                       | 1.552329 0.0042117               | 0.0188786 0.0001326              | 3.511681 0.0257445               | 0.0051692 0.0000361              | 88.09281 0.3778455                | 5.955534 0.0329569                             | 28.30 $\pm$ 0.16 |  |
| 58318-01     | FCp 38-34                       | 5.480536 0.014378                                       | 0.799756 0.0024114               | 0.010746 0.0000803               | 1.847592 0.0174469               | 0.0030397 0.0000326              | 86.30018 0.3935482                | 5.923715 0.0358637                             | 28.15 $\pm$ 0.17 |  |
| 58318-02     | FCp 38-34                       | 4.928144 0.012449                                       | 0.7252527 0.0019123              | 0.009136 0.0000794               | 1.695969 0.015678                | 0.0025322 0.0000306              | 87.5605 0.3875785                 | 5.959752 0.0340758                             | 28.32 $\pm$ 0.16 |  |
| 58319-01     | FCp 34-28                       | 8.075953 0.021276                                       | 1.131702 0.0032113               | 0.0140455 0.0000975              | 2.652775 0.022446                | 0.0050252 0.0000361              | 84.23073 0.3740773                | 6.020912 0.0362912                             | 28.61 $\pm$ 0.17 |  |
| 58319-02     | FCp 34-28                       | 11.26224 0.023262                                       | 1.542538 0.0034114               | 0.0195433 0.0001228              | 3.580551 0.0293818               | 0.0079795 0.0000416              | 81.59714 0.2925775                | 5.967429 0.0335467                             | 28.35 $\pm$ 0.16 |  |
| 58319-03     | FCp 34-28                       | 11.65947 0.021299                                       | 1.602875 0.0032114               | 0.0208121 0.000113               | 3.636069 0.0259726               | 0.0084818 0.0000416              | 80.98953 0.261677                 | 5.900841 0.0322607                             | 28.04 $\pm$ 0.15 |  |
| 58319-04     | FCp 34-28                       | 10.51181 0.023031                                       | 1.461512 0.0037085               | 0.0185558 0.0001022              | 3.341358 0.0233342               | 0.0068874 0.0000304              | 83.17247 0.3020132                | 5.991919 0.0335239                             | 28.47 $\pm$ 0.16 |  |
|              |                                 | $J=0.002656 \pm 0.000004$                               |                                  |                                  |                                  |                                  |                                   |                                                |                  |  |

|          |           |          |          |           |           |           |           |           |           |           |           |          |           |          |           |              |
|----------|-----------|----------|----------|-----------|-----------|-----------|-----------|-----------|-----------|-----------|-----------|----------|-----------|----------|-----------|--------------|
| 58326-01 | FCp 28-22 | 12.06906 | 0.021034 | 1.716129  | 0.0035082 | 0.0228001 | 0.0001317 | 3.891812  | 0.0269128 | 0.0081987 | 0.0000361 | 82.49785 | 0.2467159 | 5.811259 | 0.0303079 | 27.63 ± 0.14 |
| 58326-02 | FCp 28-22 | 10.81754 | 0.022033 | 1.559063  | 0.0035082 | 0.0208717 | 0.000112  | 3.608975  | 0.0251403 | 0.0066896 | 0.0000323 | 84.38749 | 0.2851553 | 5.864923 | 0.0307997 | 27.89 ± 0.15 |
| 58326-03 | FCp 28-22 | 10.87352 | 0.025448 | 1.561388  | 0.0035318 | 0.0211884 | 0.0001289 | 3.632975  | 0.024555  | 0.0068832 | 0.0000588 | 83.95961 | 0.3492773 | 5.856699 | 0.0334446 | 27.85 ± 0.16 |
| 58327-01 | FCp 22-15 | 17.07521 | 0.032349 | 2.081662  | 0.0040294 | 0.0280849 | 0.0001382 | 4.947251  | 0.0262759 | 0.0170559 | 0.0000672 | 72.79234 | 0.2653305 | 5.981195 | 0.0397921 | 28.44 ± 0.19 |
| 58327-02 | FCp 22-15 | 16.08834 | 0.030369 | 2.013259  | 0.0040293 | 0.0278566 | 0.0001196 | 4.826701  | 0.0280089 | 0.0150845 | 0.0000638 | 74.68577 | 0.26695   | 5.978635 | 0.0381678 | 28.42 ± 0.18 |
| 58327-03 | FCp 22-15 | 14.31683 | 0.029376 | 1.741821  | 0.0034316 | 0.0239876 | 0.0001196 | 4.230143  | 0.0192266 | 0.0143771 | 0.0000618 | 72.68078 | 0.2878346 | 5.984482 | 0.0407631 | 28.45 ± 0.19 |
| 58327-04 | FCp 22-15 | 13.1526  | 0.023469 | 1.616393  | 0.0027366 | 0.0225309 | 0.0001196 | 3.956114  | 0.0182532 | 0.0130118 | 0.0000638 | 73.16439 | 0.2668805 | 5.963952 | 0.0391624 | 28.35 ± 0.18 |
| 58327-05 | FCp 22-15 | 12.66148 | 0.022487 | 1.578648  | 0.0029346 | 0.02125   | 0.0001015 | 3.822351  | 0.0189158 | 0.0120483 | 0.0000638 | 74.28721 | 0.2700456 | 5.968618 | 0.0385448 | 28.38 ± 0.18 |
| 58328-01 | FCp 15-10 | 15.95664 | 0.011934 | 1.936934  | 0.003431  | 0.0372544 | 0.0004723 | 4.804008  | 0.0229429 | 0.0209284 | 0.0001575 | 63.65144 | 0.3060596 | 5.253104 | 0.0466572 | 25.00 ± 0.22 |
| 58328-02 | FCp 15-10 | 16.75764 | 0.020525 | 1.954636  | 0.003232  | 0.0291891 | 0.0001572 | 4.874449  | 0.0196007 | 0.0194079 | 0.0000722 | 68.09646 | 0.1980797 | 5.84869  | 0.0415406 | 27.81 ± 0.20 |
| 58328-03 | FCp 15-10 | 19.1303  | 0.01569  | 2.185536  | 0.0030332 | 0.033152  | 0.0001957 | 5.392252  | 0.0196099 | 0.0233863 | 0.0000784 | 66.12386 | 0.1581032 | 5.798304 | 0.042111  | 27.57 ± 0.20 |
| 58328-04 | FCp 15-10 | 20.25926 | 0.015664 | 2.336109  | 0.0032309 | 0.0383656 | 0.0003037 | 5.754129  | 0.021402  | 0.0259973 | 0.0001109 | 64.34769 | 0.1878085 | 5.590372 | 0.0435691 | 26.59 ± 0.21 |
| 58329-01 | FCp 10-5  | 6.241145 | 0.007617 | 0.6778969 | 0.0012686 | 0.0099531 | 0.0000851 | 1.748881  | 0.0160737 | 0.0081553 | 0.0000566 | 63.62044 | 0.3068003 | 5.868339 | 0.0519873 | 27.90 ± 0.25 |
| 58329-02 | FCp 10-5  | 1.036813 | 0.004897 | 0.1185609 | 0.0004978 | 0.001782  | 0.000058  | 0.3018903 | 0.0091673 | 0.0012253 | 0.0000497 | 67.40016 | 1.532493  | 5.90507  | 0.1391714 | 28.08 ± 0.66 |
| 58329-03 | FCp 10-5  | 11.92269 | 0.012832 | 1.364877  | 0.001653  | 0.0196751 | 0.0001196 | 3.566705  | 0.0213343 | 0.0139791 | 0.0000618 | 67.73807 | 0.2035607 | 5.928443 | 0.0423163 | 28.19 ± 0.20 |
| 58329-04 | FCp 10-5  | 1.53115  | 0.005727 | 0.180099  | 0.0006425 | 0.0027928 | 0.0000686 | 0.4544564 | 0.0101392 | 0.0017699 | 0.0000513 | 68.21056 | 1.092317  | 5.809709 | 0.0999723 | 27.63 ± 0.47 |
| 58330-01 | FCp 5     | 4.659394 | 0.008004 | 0.5102856 | 0.0014591 | 0.0149808 | 0.0004723 | 1.442761  | 0.0147061 | 0.0095874 | 0.0001386 | 41.68602 | 0.8997557 | 3.814223 | 0.0998057 | 18.19 ± 0.47 |
| 58330-02 | FCp 5     | 4.013996 | 0.008844 | 0.442308  | 0.0013629 | 0.0141706 | 0.0003829 | 1.264586  | 0.0142549 | 0.0086394 | 0.0001292 | 38.93593 | 0.9822023 | 3.540891 | 0.1062696 | 16.89 ± 0.50 |
| 58330-03 | FCp 5     | 2.058082 | 0.00767  | 0.2193763 | 0.0010605 | 0.0099106 | 0.0003928 | 0.6593539 | 0.0114052 | 0.0058734 | 0.00012   | 18.26645 | 1.766967  | 1.717459 | 0.1810704 | 8.21 ± 0.86  |

## Age spectrum

$$J=0.002652 \pm 0.000002$$

|           |            |            |          |            |           |            |           |            |           |            |           |           |           |           |           |                |
|-----------|------------|------------|----------|------------|-----------|------------|-----------|------------|-----------|------------|-----------|-----------|-----------|-----------|-----------|----------------|
| 58306-05A | FCp 125-85 | 0.0144995  | 0.004579 | 0.0014048  | 0.0004182 | 0.0002323  | 0.0000558 | -0.0039978 | 0.0080036 | 0.000139   | 0.0000495 | -185.2973 | 121.0567  | -19.08275 | 12.33671  | -              |
| 58306-05B | FCp 125-85 | 0.0027486  | 0.004528 | 0.0001067  | 0.000408  | 0.0000711  | 0.0000528 | 0.0060396  | 0.0080075 | 0.0000435  | 0.0000489 | -349.6803 | 798.1793  | -94.14302 | 410.0016  | -              |
| 58306-05C | FCp 125-85 | 0.0151092  | 0.00453  | 0.0000955  | 0.0004097 | -0.0000103 | 0.0000507 | 0.0011312  | 0.0081043 | 7.50E-06   | 0.0000489 | 85.91569  | 103.6807  | 137.1894  | 624.3628  | -              |
| 58306-05D | FCp 125-85 | 0.0306728  | 0.004537 | 0.0011301  | 0.0004184 | 0.0000266  | 0.0001078 | -0.0370011 | 0.0140035 | -5.40E-06  | 0.0000566 | 95.58391  | 58.44428  | 25.31279  | 17.66493  | 117.23 ± 79.21 |
| 58306-05E | FCp 125-85 | 0.0174249  | 0.004544 | 0.0014652  | 0.0004575 | -0.0000811 | 0.0001477 | 0.0435211  | 0.0231626 | 0.0002503  | 0.00008   | -304.6975 | 159.8381  | -37.07092 | 20.69933  | -              |
| 58306-05F | FCp 125-85 | 0.6715033  | 0.004707 | 0.0761712  | 0.000463  | 0.0009791  | 0.0000558 | 0.180099   | 0.0105585 | 0.000508   | 0.0000509 | 79.78237  | 2.421566  | 7.045465  | 0.214942  | 33.40 ± 1.01   |
| 58306-05G | FCp 125-85 | 0.4531326  | 0.004623 | 0.0646554  | 0.000496  | 0.0006866  | 0.0001668 | 0.1252246  | 0.0183144 | 0.0001983  | 0.0000679 | 89.26742  | 4.650157  | 6.26481   | 0.3244999 | 29.73 ± 1.53   |
| 58306-05H | FCp 125-85 | 0.6520025  | 0.004691 | 0.0895247  | 0.0005339 | 0.000528   | 0.0001382 | 0.206493   | 0.0183235 | 0.0000918  | 0.0000625 | 98.35226  | 3.018867  | 7.174791  | 0.2192327 | 34.01 ± 1.03   |
| 58306-05I | FCp 125-85 | 1.824621   | 0.004836 | 0.2381365  | 0.000692  | 0.0032859  | 0.0000989 | 0.6108343  | 0.0123059 | 0.0008069  | 0.0000566 | 89.60433  | 0.9867279 | 6.87831   | 0.0795429 | 32.62 ± 0.37   |
| 58306-05J | FCp 125-85 | 3.017425   | 0.005582 | 0.3510941  | 0.0007254 | 0.0045407  | 0.0000963 | 0.8998622  | 0.0151453 | 0.0009015  | 0.0000532 | 93.55097  | 0.5825449 | 8.055104  | 0.0557559 | 38.14 ± 0.26   |
| 58306-05K | FCp 125-85 | 2.965098   | 0.00532  | 0.4248589  | 0.00089   | 0.0053028  | 0.0000894 | 1.102884   | 0.0134754 | 0.0007686  | 0.0000532 | 95.30744  | 0.5883365 | 6.663975  | 0.0455237 | 31.61 ± 0.21   |
| 58306-05L | FCp 125-85 | 9.083938   | 0.007565 | 1.451352   | 0.0016543 | 0.0176998  | 0.0001015 | 3.685842   | 0.0172422 | 0.0018781  | 0.0000524 | 97.12716  | 0.2090325 | 6.090185  | 0.0207672 | 28.91 ± 0.10   |
| 58307-05A | FCp 85-74  | 0.0009994  | 0.004625 | -0.0001824 | 0.000416  | -0.0000429 | 0.0000569 | -0.0050157 | 0.0092814 | -0.0000595 | 0.0000497 | 1818.556  | 8556.14   | -101.7752 | 255.754   | -              |
| 58307-05B | FCp 85-74  | -0.0005647 | 0.004639 | -0.0002751 | 0.0004206 | -0.0001338 | 0.0000592 | 0.028877   | 0.017258  | -0.0000992 | 0.0000492 | -5498.244 | 45270.25  | -104.4835 | 158.7306  | -              |
| 58307-05C | FCp 85-74  | 0.0053072  | 0.004671 | -0.0002261 | 0.0004308 | -0.0003715 | 0.0000794 | -0.0413579 | 0.0136612 | -0.0003671 | 0.0000577 | 2080.858  | 1861.638  | -567.2379 | 1279.727  | -              |
| 58307-05D | FCp 85-74  | 0.0150173  | 0.004682 | 0.0001176  | 0.0004231 | -0.0000332 | 0.0000694 | 0.0193447  | 0.0108804 | 0.0001227  | 0.0000551 | -131.2242 | 120.2742  | -191.536  | 817.3723  | -              |
| 58307-05E | FCp 85-74  | 0.0439199  | 0.004708 | 0.0018868  | 0.0004334 | -0.000047  | 0.0000558 | -0.0145471 | 0.0115364 | 0.000095   | 0.0000532 | 33.40597  | 37.6794   | 7.730687  | 8.86633   | 36.62 ± 41.57  |
| 58307-05F | FCp 85-74  | 0.7857217  | 0.004932 | 0.1006421  | 0.0004911 | 0.0012177  | 0.0000563 | 0.2305065  | 0.0107785 | 0.0007018  | 0.0000513 | 75.94193  | 2.090154  | 5.938639  | 0.1646176 | 28.19 ± 0.78   |
| 58307-05G | FCp 85-74  | 0.3376121  | 0.00487  | 0.0490273  | 0.000478  | 0.0005512  | 0.00005   | 0.1292423  | 0.008869  | 0.0001273  | 0.0000488 | 91.9126   | 4.716871  | 6.34133   | 0.3192119 | 30.09 ± 1.50   |
| 58307-05H | FCp 85-74  | 0.2147908  | 0.00485  | 0.0308094  | 0.0004517 | 0.0003143  | 0.0000496 | 0.0780642  | 0.008636  | 0.0001041  | 0.0000487 | 88.57668  | 7.365777  | 6.186489  | 0.5041509 | 29.36 ± 2.37   |

|                              |             |            |          |            |           |            |           |            |           |            |           |           |           |           |           |                |
|------------------------------|-------------|------------|----------|------------|-----------|------------|-----------|------------|-----------|------------|-----------|-----------|-----------|-----------|-----------|----------------|
| 58307-05I                    | FCp 85-74   | 2.162365   | 0.005492 | 0.3183077  | 0.0008917 | 0.0039556  | 0.0000658 | 0.8586661  | 0.0110518 | 0.0011299  | 0.0000497 | 87.72539  | 0.7623436 | 5.971067  | 0.0564655 | 28.35 ± 0.27   |
| 58307-05K                    | FCp 85-74   | 3.266716   | 0.00464  | 0.4964192  | 0.0008671 | 0.0063221  | 0.0000598 | 1.215074   | 0.0129635 | 0.001419   | 0.0000304 | 90.13083  | 0.33864   | 5.941507  | 0.0300855 | 28.21 ± 0.14   |
| 58307-05L                    | FCp 85-74   | 12.80119   | 0.008287 | 2.025536   | 0.001706  | 0.0251908  | 0.0001412 | 5.064025   | 0.0219257 | 0.0041166  | 0.0000413 | 93.6527   | 0.133964  | 5.929342  | 0.0192249 | 28.15 ± 0.09   |
| 58308-05A                    | FCp 74-63   | 0.0034094  | 0.002812 | -0.0002795 | 0.0001253 | -0.0001354 | 0.000042  | -0.0023424 | 0.0165587 | -0.0001945 | 0.0000333 | 1779.737  | 1498.8    | -218.4758 | 106.8217  | -              |
| 58308-05B                    | FCp 74-63   | -0.0025665 | 0.00281  | -0.0001786 | 0.0001286 | -0.0001489 | 0.0000494 | 0.0055942  | 0.0134561 | -3.40E-06  | 0.0000333 | 44.36171  | 404.5683  | 6.225443  | 56.56899  | 29.55 ± 266.28 |
| 58308-05C                    | FCp 74-63   | 0.0289949  | 0.002817 | 0.0007909  | 0.0001148 | 0.0000241  | 0.000042  | 0.0128737  | 0.0102566 | 0.0000358  | 0.0000278 | 67.0609   | 30.85269  | 24.89261  | 11.82157  | 115.34 ± 53.06 |
| 58308-05D                    | FCp 74-63   | 0.0314512  | 0.002816 | 0.0019539  | 0.0001299 | 0.0000308  | 0.0000394 | 0.0043563  | 0.0100019 | 0.0000575  | 0.0000266 | 47.07661  | 27.0892   | 7.590306  | 4.348834  | 35.96 ± 20.40  |
| 58308-05E                    | FCp 74-63   | 0.0140683  | 0.00281  | 0.0017628  | 0.0001117 | 0.0000114  | 0.0000292 | -0.0049836 | 0.0079475 | 0.0000723  | 0.0000266 | -54.73098 | 60.70403  | -4.358256 | 4.762904  | -              |
| 58308-05F                    | FCp 74-63   | 0.5724273  | 0.003008 | 0.0760587  | 0.000278  | 0.0010186  | 0.0000324 | 0.1852351  | 0.0084493 | 0.0004425  | 0.0000239 | 79.73535  | 1.41548   | 6.011529  | 0.107836  | 28.54 ± 0.51   |
| 58308-05G                    | FCp 74-63   | 0.2883618  | 0.002938 | 0.0435268  | 0.0002049 | 0.0005597  | 0.0000248 | 0.1015678  | 0.0083619 | 0.0001519  | 0.0000232 | 87.2461   | 2.757157  | 5.789621  | 0.1766699 | 27.49 ± 0.83   |
| 58308-05H                    | FCp 74-63   | 0.5528708  | 0.002973 | 0.0811448  | 0.0002501 | 0.0010241  | 0.0000316 | 0.1912279  | 0.0084568 | 0.0002889  | 0.0000237 | 87.3167   | 1.463501  | 5.959257  | 0.098741  | 28.29 ± 0.47   |
| 58308-05I                    | FCp 74-63   | 2.162456   | 0.006083 | 0.3291671  | 0.0009169 | 0.0039552  | 0.0000394 | 0.787128   | 0.0109735 | 0.0009384  | 0.0000251 | 90.07829  | 0.515867  | 5.92779   | 0.0390239 | 28.14 ± 0.18   |
| 58308-05J                    | FCp 74-63   | 3.328832   | 0.008287 | 0.5195472  | 0.0012062 | 0.0063874  | 0.0000569 | 1.26505    | 0.0121417 | 0.001186   | 0.0000246 | 92.50251  | 0.4083057 | 5.937114  | 0.0312459 | 28.19 ± 0.15   |
| 58308-05K                    | FCp 74-63   | 3.318066   | 0.007354 | 0.5121419  | 0.0013061 | 0.0062132  | 0.0000598 | 1.260751   | 0.0118492 | 0.0011709  | 0.0000251 | 92.60196  | 0.3801375 | 6.010067  | 0.0314847 | 28.53 ± 0.15   |
| 58308-05L                    | FCp 74-63   | 12.76236   | 0.018217 | 1.887912   | 0.0027068 | 0.0232467  | 0.0001016 | 4.665605   | 0.0221199 | 0.0045458  | 0.0000333 | 92.39001  | 0.212775  | 6.256681  | 0.0236342 | 29.69 ± 0.11   |
| <i>J=0.002655 ± 0.000004</i> |             |            |          |            |           |            |           |            |           |            |           |           |           |           |           |                |
| 58315-05A                    | FCp 63-53   | 0.00847    | 0.002812 | 0.0002466  | 0.0001067 | 0.0000285  | 0.0000205 | 0.0029349  | 0.0076836 | 0.000013   | 0.0000229 | 57.52272  | 89.02865  | 19.93922  | 31.45684  | -              |
| 58315-05B                    | FCp 63-53   | 0.0054392  | 0.002807 | 0.0000592  | 0.000108  | 0.0000225  | 0.0000216 | 0.0062157  | 0.0077407 | 0.000034   | 0.0000229 | -75.66283 | 141.2974  | -75.54116 | 203.4809  | -              |
| 58315-05C                    | FCp 63-53   | 0.0315961  | 0.002817 | 0.0013635  | 0.0001089 | 0.0000193  | 0.0000216 | 0.0063546  | 0.0076936 | 0.0000647  | 0.0000229 | 41.10662  | 23.65017  | 9.55915   | 5.49424   | 45.21 ± 25.66  |
| 58315-05D                    | FCp 63-53   | 0.0080434  | 0.002807 | 0.0006988  | 0.000103  | 0.0000299  | 0.0000206 | 0.004601   | 0.0076971 | -9.02E-06  | 0.0000229 | 137.75    | 103.4047  | 15.93338  | 10.86926  | 74.73 ± 49.94  |
| 58315-05E                    | FCp 63-53   | 0.0288734  | 0.002813 | 0.0025686  | 0.0001181 | 0.0000186  | 0.0000222 | 0.0069332  | 0.0078743 | 0.0000241  | 0.000023  | 77.271    | 26.75603  | 8.703249  | 2.922522  | 41.21 ± 13.68  |
| 58315-05F                    | FCp 63-53   | 0.9429427  | 0.00396  | 0.1321275  | 0.0004808 | 0.0015929  | 0.0000333 | 0.3073378  | 0.0089151 | 0.0005639  | 0.000024  | 84.92612  | 0.9407554 | 6.07096   | 0.0701231 | 28.84 ± 0.33   |
| 58315-05G                    | FCp 63-53   | 0.6303599  | 0.003225 | 0.0939845  | 0.0002874 | 0.001224   | 0.0000292 | 0.2188313  | 0.0085205 | 0.0003266  | 0.0000237 | 87.45821  | 1.309786  | 5.875635  | 0.0872155 | 27.92 ± 0.41   |
| 58315-05H                    | FCp 63-53   | 1.368258   | 0.004252 | 0.2093159  | 0.000599  | 0.0025447  | 0.0000394 | 0.4909957  | 0.0097258 | 0.000555   | 0.0000242 | 90.87387  | 0.6757345 | 5.950194  | 0.0476041 | 28.27 ± 0.22   |
| 58315-05I                    | FCp 63-53   | 2.066551   | 0.004801 | 0.3229752  | 0.0007179 | 0.0039644  | 0.0000522 | 0.7656543  | 0.0103839 | 0.0007981  | 0.0000246 | 91.54215  | 0.476833  | 5.867211  | 0.0353445 | 27.88 ± 0.17   |
| 58315-05J                    | FCp 63-53   | 2.306374   | 0.005048 | 0.3651445  | 0.0008372 | 0.0044688  | 0.0000466 | 0.8688005  | 0.0117994 | 0.0007248  | 0.0000241 | 93.71815  | 0.435648  | 5.929588  | 0.0326823 | 28.18 ± 0.15   |
| 58315-05K                    | FCp 63-53   | 3.105082   | 0.004801 | 0.5040972  | 0.0008472 | 0.0061921  | 0.0000569 | 1.2716     | 0.0125599 | 0.0007739  | 0.0000246 | 95.90168  | 0.3215781 | 5.917891  | 0.0256163 | 28.12 ± 0.12   |
| 58315-05L                    | FCp 63-53   | 2.361592   | 0.004252 | 0.3850692  | 0.0006981 | 0.0046634  | 0.0000513 | 0.9157773  | 0.0119638 | 0.0005448  | 0.0000242 | 96.27534  | 0.3969031 | 5.914461  | 0.0289253 | 28.10 ± 0.14   |
| 58316-05A                    | FCp 53-38 I | 0.0139193  | 0.002813 | 0.0002621  | 0.0001067 | 0.0000162  | 0.0000216 | -0.0008132 | 0.0079196 | 0.000029   | 0.0000229 | 38.01858  | 53.48184  | 20.13958  | 29.28474  | -              |
| 58316-05B                    | FCp 53-38 I | 0.0021828  | 0.002808 | 0.0000113  | 0.0001037 | -0.0000327 | 0.0000205 | -0.016491  | 0.007732  | -0.0000186 | 0.0000227 | 291.7111  | 503.3083  | 267.2644  | 1215.741  | -              |
| 58316-05C                    | FCp 53-38 I | 0.0169726  | 0.00281  | 0.0005062  | 0.0001033 | 3.98E-06   | 0.0000205 | 0.0044438  | 0.0078781 | 0.0000555  | 0.0000228 | 5.534465  | 43.36476  | 1.868188  | 14.64519  | 8.92 ± 69.79   |
| 58316-05D                    | FCp 53-38 I | 0.0747827  | 0.002821 | 0.0059964  | 0.0001253 | 0.0000918  | 0.0000211 | 0.0103863  | 0.0079405 | 0.0001133  | 0.000023  | 56.33914  | 10.13233  | 7.035064  | 1.24835   | 33.38 ± 5.87   |
| 58316-05E                    | FCp 53-38 I | 0.0218107  | 0.00281  | 0.0027518  | 0.0001098 | 0.0000312  | 0.0000211 | 0.0015344  | 0.0078305 | 0.0000255  | 0.0000228 | 66.00456  | 34.70007  | 5.233196  | 2.676945  | 24.89 ± 12.64  |
| 58316-05F                    | FCp 53-38 I | 0.9736592  | 0.003329 | 0.1349644  | 0.0003929 | 0.0018024  | 0.00003   | 0.3356562  | 0.0089597 | 0.0006636  | 0.0000246 | 82.60958  | 0.8745873 | 5.970297  | 0.067055  | 28.37 ± 0.32   |
| 58316-05G                    | FCp 53-38 I | 0.4062566  | 0.002907 | 0.0606096  | 0.0002227 | 0.00077    | 0.0000255 | 0.1433724  | 0.0089638 | 0.000192   | 0.0000234 | 88.84822  | 1.96501   | 5.965433  | 0.128454  | 28.34 ± 0.61   |
| 58316-05H                    | FCp 53-38 I | 0.4692937  | 0.002941 | 0.0699641  | 0.0002593 | 0.0008582  | 0.0000269 | 0.1727397  | 0.0086683 | 0.0002454  | 0.0000235 | 87.48465  | 1.71228   | 5.878543  | 0.1131869 | 27.93 ± 0.53   |
| 58316-05I                    | FCp 53-38 I | 2.433852   | 0.005471 | 0.3659247  | 0.0008273 | 0.0044967  | 0.0000513 | 0.8693326  | 0.0109638 | 0.0010949  | 0.0000251 | 89.55429  | 0.4330943 | 5.966588  | 0.0349991 | 28.35 ± 0.16   |
| 58316-05J                    | FCp 53-38 I | 2.045856   | 0.004482 | 0.3172948  | 0.0007974 | 0.0038881  | 0.0000385 | 0.7440629  | 0.0113972 | 0.000806   | 0.0000251 | 91.25819  | 0.4728203 | 5.893991  | 0.0364314 | 28.01 ± 0.17   |
| 58316-05K                    | FCp 53-38 I | 1.923511   | 0.004405 | 0.2952178  | 0.0007776 | 0.0036402  | 0.0000485 | 0.7218483  | 0.0112579 | 0.000763   | 0.0000261 | 91.27093  | 0.5114749 | 5.957221  | 0.0390517 | 28.31 ± 0.18   |
| 58316-05L                    | FCp 53-38 I | 10.30168   | 0.013298 | 1.584985   | 0.001806  | 0.0193712  | 0.0001016 | 3.770358   | 0.0226725 | 0.0043024  | 0.0000372 | 90.57679  | 0.2079731 | 5.897079  | 0.0228438 | 28.02 ± 0.11   |
| 58319-05A                    | FCp 34-28   | -0.0015348 | 0.002807 | -0.0001425 | 0.0001027 | -0.0000115 | 0.00002   | 0.0021707  | 0.0079195 | 0.0000208  | 0.0000228 | 489.93    | 1015.874  | 52.15551  | 63.55752  | -              |
| 58319-05B                    | FCp 34-28   | -0.0020471 | 0.002809 | -0.0001052 | 0.0001044 | -0.0000105 | 0.0000197 | 0.0092246  | 0.007748  | -6.12E-06  | 0.0000226 | -24.24148 | 358.2867  | -4.422964 | 65.18441  | -              |
| 58319-05C                    | FCp 34-28   | 0.1276323  | 0.002823 | 0.0080517  | 0.0001266 | 0.0001785  | 0.0000241 | 0.0140794  | 0.0078671 | 0.0002706  | 0.0000233 | 38.22819  | 5.924821  | 6.067572  | 0.9414985 | 28.83 ± 4.44   |
| 58319-05D                    | FCp 34-28   | 0.0050708  | 0.002806 | 0.0008027  | 0.0001071 | -2.43E-06  | 0.0000202 | 0.0087209  | 0.0077083 | 3.86E-06   | 0.0000227 | 91.18684  | 153.0832  | 5.807705  | 9.243047  | 27.60 ± 43.59  |
| 58319-05E                    | FCp 34-28   | 0.0800504  | 0.002821 | 0.0082838  | 0.0001266 | 0.0001189  | 0.0000222 | 0.0202524  | 0.0079368 | 0.0001213  | 0.0000229 | 57.22275  | 9.453271  | 5.539577  | 0.8999245 | 26.34 ± 4.25   |

|                             |           |            |          |            |           |            |           |            |           |           |           |           |           |           |           |               |
|-----------------------------|-----------|------------|----------|------------|-----------|------------|-----------|------------|-----------|-----------|-----------|-----------|-----------|-----------|-----------|---------------|
| 58319-05F                   | FCp 34-28 | 0.7794314  | 0.003225 | 0.0967191  | 0.0002969 | 0.0013464  | 0.0000324 | 0.2366191  | 0.0093249 | 0.0007636 | 0.0000246 | 73.47058  | 1.072481  | 5.931274  | 0.091004  | 28.18 ± 0.43  |
| 58319-05G                   | FCp 34-28 | 0.3268063  | 0.002904 | 0.0464007  | 0.0002049 | 0.0005513  | 0.0000316 | 0.1117857  | 0.008021  | 0.000219  | 0.0000233 | 82.9209   | 2.418333  | 5.850331  | 0.1663983 | 27.80 ± 0.78  |
| 58319-05H                   | FCp 34-28 | 1.32302    | 0.004104 | 0.1777895  | 0.0004808 | 0.002388   | 0.000042  | 0.4253022  | 0.0101929 | 0.0010443 | 0.0000251 | 79.23853  | 0.6915598 | 5.906693  | 0.0575639 | 28.07 ± 0.27  |
| 58319-05I                   | FCp 34-28 | 2.828767   | 0.009044 | 0.3945934  | 0.001406  | 0.0049304  | 0.0000522 | 0.9125609  | 0.0134342 | 0.0017239 | 0.0000261 | 84.56305  | 0.505648  | 6.072226  | 0.0444468 | 28.85 ± 0.21  |
| 58319-05J                   | FCp 34-28 | 2.916538   | 0.01     | 0.423371   | 0.001406  | 0.0051937  | 0.000056  | 0.9716271  | 0.0134404 | 0.001653  | 0.0000261 | 85.90719  | 0.5299626 | 5.927729  | 0.0424968 | 28.17 ± 0.20  |
| 58319-05K                   | FCp 34-28 | 4.281939   | 0.010192 | 0.6177846  | 0.001606  | 0.0077981  | 0.0000607 | 1.454591   | 0.0150815 | 0.0023496 | 0.0000284 | 86.49368  | 0.3756979 | 6.005096  | 0.0346864 | 28.53 ± 0.16  |
| 58319-05L                   | FCp 34-28 | 6.554535   | 0.009426 | 0.99587    | 0.001506  | 0.0124732  | 0.0000879 | 2.374438   | 0.0169649 | 0.0029643 | 0.0000297 | 89.52475  | 0.2388084 | 5.902308  | 0.0251871 | 28.05 ± 0.12  |
| <i>J=0.002656 ±0.000004</i> |           |            |          |            |           |            |           |            |           |           |           |           |           |           |           |               |
| 58327-05A                   | FCp 22-15 | 0.0004204  | 0.000604 | 0.0000433  | 0.0000425 | 0.0000154  | 0.0000329 | 0.0057952  | 0.0081176 | 0.0000271 | 0.0000187 | -1690.956 | 2771.913  | -182.6064 | 248.4986  | -             |
| 58327-05B                   | FCp 22-15 | -0.0001092 | 0.000611 | 0.0000113  | 0.0000404 | 0.0000194  | 0.0000326 | -0.0038321 | 0.008005  | 0.0000118 | 0.0000189 | 3567.831  | 20621.6   | -274.3066 | 886.7067  | -             |
| 58327-05C                   | FCp 22-15 | -0.0006011 | 0.000611 | -0.0000137 | 0.0000418 | -1.37E-06  | 0.0000326 | -0.0008068 | 0.0079604 | 0.0000106 | 0.0000188 | 630.4567  | 1133.12   | 288.8329  | 1043.321  | -             |
| 58327-05D                   | FCp 22-15 | 0.0061484  | 0.000622 | 0.0001826  | 0.0000433 | -0.0000256 | 0.0000326 | -0.0050298 | 0.0082651 | 0.0000187 | 0.000019  | 3.706153  | 92.41644  | 1.222327  | 30.48388  | 5.85 ± 145.60 |
| 58327-05E                   | FCp 22-15 | 0.0122008  | 0.000615 | 0.0011683  | 0.0000479 | -8.79E-06  | 0.0000329 | 0.0051513  | 0.0080187 | 0.0000321 | 0.0000188 | 25.58047  | 46.06427  | 2.680218  | 4.828142  | 12.80 ± 22.97 |
| 58327-05F                   | FCp 22-15 | 0.1232759  | 0.000739 | 0.0168324  | 0.0001334 | 0.0003061  | 0.000038  | 0.0444479  | 0.0082827 | 0.0001442 | 0.0000197 | 68.31771  | 4.800456  | 5.012954  | 0.3549354 | 23.86 ± 1.68  |
| 58327-05G                   | FCp 22-15 | 0.0184309  | 0.000635 | 0.0024372  | 0.0000588 | 0.0000246  | 0.0000321 | 0.0108828  | 0.0082174 | 0.000012  | 0.0000189 | 85.39999  | 30.92756  | 6.479542  | 2.343513  | 30.78 ± 11.04 |
| 58327-05H                   | FCp 22-15 | 0.0184105  | 0.000654 | 0.0022648  | 0.0000623 | 0.0000219  | 0.0000329 | 0.011745   | 0.0080955 | 0.0000282 | 0.0000189 | 59.81429  | 30.80319  | 4.881095  | 2.513369  | 23.24 ± 11.89 |
| 58327-05I                   | FCp 22-15 | 0.0188268  | 0.000644 | 0.0023067  | 0.0000579 | 0.0000183  | 0.0000323 | 0.0026744  | 0.0081025 | 0.000028  | 0.000019  | 57.15306  | 30.30067  | 4.668405  | 2.474564  | 22.23 ± 11.71 |
| 58327-05J                   | FCp 22-15 | 0.0075189  | 0.000611 | 0.0008385  | 0.0000487 | -0.0000181 | 0.0000324 | -0.0005191 | 0.0080499 | -1.05E-06 | 0.0000189 | 103.5161  | 75.87745  | 9.277071  | 6.788337  | 43.92 ± 31.75 |
| 58327-05K                   | FCp 22-15 | 0.0117324  | 0.000635 | 0.0014151  | 0.0000588 | 8.59E-06   | 0.0000364 | 0.007411   | 0.0083047 | 2.53E-06  | 0.0000199 | 98.65531  | 51.04791  | 8.211434  | 4.244294  | 38.92 ± 19.90 |
| 58327-05L                   | FCp 22-15 | 0.0495728  | 0.000654 | 0.00573    | 0.0000976 | 0.0001055  | 0.000038  | 0.0127955  | 0.008907  | 0.0000962 | 0.0000206 | 44.73429  | 12.44792  | 3.876391  | 1.081293  | 18.48 ± 5.13  |
| 58328-05A                   | FCp 15-10 | 0.0047922  | 0.002808 | 0.0000732  | 0.0001076 | -0.0000205 | 0.0000284 | 0.0003516  | 0.0079305 | -6.73E-06 | 0.0000231 | 142.0181  | 175.9172  | 93.26182  | 173.3112  | -             |
| 58328-05B                   | FCp 15-10 | 0.0015185  | 0.002808 | 0.0000227  | 0.0001023 | -0.0000154 | 0.0000211 | 0.0077781  | 0.0079341 | -5.82E-06 | 0.0000228 | 253.9792  | 673.801   | 229.9269  | 1500.653  | -             |
| 58328-05C                   | FCp 15-10 | 0.1168897  | 0.002824 | 0.0041408  | 0.0001381 | 0.0001227  | 0.00003   | -0.0030709 | 0.0096955 | 0.0002953 | 0.0000266 | 25.13818  | 7.22597   | 7.092078  | 2.056591  | 33.67 ± 9.67  |
| 58328-05D                   | FCp 15-10 | 0.0488993  | 0.002822 | 0.0032803  | 0.0001546 | -0.0001648 | 0.000056  | -0.0079842 | 0.0147589 | 0.0000186 | 0.000038  | 87.38848  | 24.36845  | 13.00233  | 3.606172  | 61.25 ± 16.70 |
| 58328-05E                   | FCp 15-10 | 0.1855393  | 0.002926 | 0.0133072  | 0.000179  | 0.0003416  | 0.0000665 | 0.0358866  | 0.0156088 | 0.0004941 | 0.0000372 | 22.85369  | 6.188086  | 3.192819  | 0.8704952 | 15.23 ± 4.14  |
| 58328-05F                   | FCp 15-10 | 1.084463   | 0.00389  | 0.1035637  | 0.0004319 | 0.0032162  | 0.0001213 | 0.25772    | 0.0246003 | 0.0023768 | 0.0000583 | 37.14977  | 1.64632   | 3.897224  | 0.1854913 | 18.58 ± 0.88  |
| 58328-05G                   | FCp 15-10 | 0.7955142  | 0.0035   | 0.086706   | 0.0003542 | 0.0024414  | 0.0001312 | 0.2280773  | 0.0094796 | 0.001599  | 0.000051  | 42.90877  | 1.958448  | 3.944386  | 0.1882306 | 18.80 ± 0.89  |
| 58328-05H                   | FCp 15-10 | 0.9966199  | 0.00389  | 0.1091514  | 0.0005005 | 0.0028941  | 0.0000977 | 0.259781   | 0.0096018 | 0.0019651 | 0.0000388 | 43.82887  | 1.233035  | 4.00878   | 0.1256122 | 19.11 ± 0.60  |
| 58328-05I                   | FCp 15-10 | 1.610009   | 0.0053   | 0.1829501  | 0.0005103 | 0.0025904  | 0.000043  | 0.4472482  | 0.0102435 | 0.0018679 | 0.0000278 | 67.93066  | 0.6529011 | 5.988709  | 0.06846   | 28.47 ± 0.32  |
| 58328-05J                   | FCp 15-10 | 2.692207   | 0.007169 | 0.3185053  | 0.0009368 | 0.0045069  | 0.0000588 | 0.7446896  | 0.0116457 | 0.003003  | 0.0000397 | 69.24349  | 0.5467626 | 5.862807  | 0.0592598 | 27.88 ± 0.28  |
| 58328-05K                   | FCp 15-10 | 3.279778   | 0.007169 | 0.4061222  | 0.0010066 | 0.0055977  | 0.0000598 | 0.9687026  | 0.0109303 | 0.0031552 | 0.0000297 | 73.927    | 0.3856509 | 5.980528  | 0.0453411 | 28.43 ± 0.21  |
| 58328-05L                   | FCp 15-10 | 6.409586   | 0.007077 | 0.8172895  | 0.0013061 | 0.0119779  | 0.0001016 | 2.054443   | 0.014178  | 0.0060614 | 0.0000372 | 74.61258  | 0.2227722 | 5.862141  | 0.0360919 | 27.87 ± 0.17  |
| 58329-05A                   | FCp 10-5  | 0.0033155  | 0.002809 | 0.0001861  | 0.000108  | 0.0000127  | 0.0000234 | 0.0025992  | 0.008118  | 0.0000186 | 0.0000234 | -59.40266 | 232.524   | -10.69894 | 41.35315  | -             |
| 58329-05B                   | FCp 10-5  | -0.0004388 | 0.002808 | -0.0000352 | 0.0001055 | 0.000011   | 0.0000222 | 0.0123521  | 0.0081219 | 9.35E-06  | 0.0000229 | 504.7162  | 3641.705  | 49.67141  | 204.2552  | -             |
| 58329-05C                   | FCp 10-5  | 0.0019726  | 0.000619 | 0.0000331  | 0.0000463 | 0.0000101  | 0.0000329 | -0.0001617 | 0.0078563 | 0.0000236 | 0.0000188 | -254.4514 | 296.5204  | -151.2576 | 272.8983  | -             |
| 58329-05D                   | FCp 10-5  | 0.0005113  | 0.000604 | 0.0000849  | 0.0000448 | -4.91E-06  | 0.0000323 | 0.0074959  | 0.0080683 | 0.000018  | 0.0000189 | -826.6721 | 1476.506  | -53.32932 | 77.39962  | -             |
| 58329-05E                   | FCp 10-5  | 0.0001327  | 0.000604 | 0.0000285  | 0.000044  | 7.98E-06   | 0.0000329 | -0.0044996 | 0.0079565 | -3.50E-06 | 0.0000189 | 610.0694  | 5091.323  | 25.36445  | 181.3826  | -             |
| 58329-05F                   | FCp 10-5  | 0.0001439  | 0.000604 | 0.0000543  | 0.0000433 | 4.95E-06   | 0.0000332 | -0.0052189 | 0.00815   | 0.0000244 | 0.0000189 | -5202.064 | 22195.48  | -128.379  | 136.3884  | -             |
| 58329-05G                   | FCp 10-5  | 0.0006868  | 0.000604 | 0.0000699  | 0.0000433 | 4.95E-06   | 0.0000329 | 0.0064869  | 0.0080892 | 0.000012  | 0.0000189 | -339.221  | 877.7869  | -35.86435 | 90.30388  | -             |
| 58329-05H                   | FCp 10-5  | 0.0006164  | 0.000604 | -0.0000347 | 0.0000433 | 0.0000144  | 0.0000325 | 0.0013653  | 0.0080329 | 7.55E-06  | 0.0000189 | -243.926  | 950.195   | 42.0861   | 167.7996  | -             |
| 58329-05I                   | FCp 10-5  | 0.0008613  | 0.000615 | 0.0000298  | 0.0000448 | 2.93E-06   | 0.0000332 | 0.0064163  | 0.0081643 | 0.000015  | 0.000019  | -354.5249 | 707.384   | -122.4848 | 318.6207  | -             |
| 58329-05J                   | FCp 10-5  | 0.0015501  | 0.000608 | 0.0001598  | 0.0000418 | 1.41E-06   | 0.0000332 | -0.0044577 | 0.0081679 | 0.0000119 | 0.0000189 | -150.2271 | 370.5293  | -14.26809 | 34.88065  | -             |
| 58329-05K                   | FCp 10-5  | 0.0068403  | 0.000611 | 0.0006803  | 0.0000528 | 0.0000263  | 0.0000324 | 0.0037797  | 0.00793   | 0.0000463 | 0.0000188 | -95.64293 | 82.67813  | -9.65632  | 8.330046  | -             |
| 58329-05L                   | FCp 10-5  | 0.2188855  | 0.000887 | 0.0272541  | 0.0001432 | 0.0003955  | 0.0000354 | 0.0723871  | 0.008397  | 0.0002182 | 0.0000196 | 73.18319  | 2.709731  | 5.888917  | 0.2215437 | 28.00 ± 1.05  |

**Electronic Annex 1**
