# Supplementary material
Source: publisher figshare collection journal article supplement (https://geolsoc.figshare.com/articles/dataset/_/3453305)
Supplement: Supplementary file 2 [file 1]

| Run ID       | Size range (µm) | <sup>40</sup> Ar ±σ (nA)                              |          | <sup>39</sup> Ar ±σ (nA) |           | <sup>38</sup> Ar ±σ (nA) |           | <sup>37</sup> Ar ±σ (nA) |           | <sup>36</sup> Ar ±σ (nA) |           | <sup>40</sup> Ar* ±σ (%) |           | <sup>40</sup> Ar*/ <sup>39</sup> Ar <sub>K</sub> ±σ |           | Age ±σ        |
|--------------|-----------------|-------------------------------------------------------|----------|--------------------------|-----------|--------------------------|-----------|--------------------------|-----------|--------------------------|-----------|--------------------------|-----------|-----------------------------------------------------|-----------|---------------|
| Total fusion |                 | $J=0.02369 \pm 0.00006 \quad D=1.007807 \pm 0.002395$ |          |                          |           |                          |           |                          |           |                          |           |                          |           |                                                     |           |               |
| 58338-01     | Hb 212+         | 1.928774                                              | 0.001706 | 0.0558794                | 0.0001756 | 0.0017251                | 0.0000336 | 0.1392334                | 0.0354696 | 0.0001001                | 0.0000175 | 99.05383                 | 0.3309076 | 34.25428                                            | 0.1830887 | 1071.9 ± 4.3  |
| 58338-02     | Hb 212+         | 6.704365                                              | 0.005362 | 0.1939476                | 0.0003435 | 0.0060062                | 0.0000555 | 0.5599345                | 0.0363093 | 0.0002425                | 0.0000183 | 99.60989                 | 0.1469418 | 34.50806                                            | 0.1136049 | 1077.9 ± 2.7  |
| 58338-03     | Hb 212+         | 9.375657                                              | 0.006948 | 0.2717764                | 0.0006531 | 0.0080777                | 0.0000653 | 0.8346249                | 0.0388871 | 0.0004162                | 0.0000189 | 99.41015                 | 0.1263015 | 34.37371                                            | 0.1247894 | 1074.7 ± 2.9  |
| 58339-01     | Hb 212-180      | 6.774476                                              | 0.005164 | 0.1964015                | 0.0003833 | 0.0055181                | 0.0000517 | 0.5460824                | 0.0371607 | 0.0002532                | 0.0000187 | 99.54935                 | 0.1434515 | 34.40954                                            | 0.1168651 | 1075.5 ± 2.8  |
| 58339-02     | Hb 212-180      | 6.139512                                              | 0.005164 | 0.1786131                | 0.0003335 | 0.0049377                | 0.0000536 | 0.4769956                | 0.0371939 | 0.0002225                | 0.0000184 | 99.55924                 | 0.1573211 | 34.29062                                            | 0.1163658 | 1072.7 ± 2.7  |
| 58339-03     | Hb 212-180      | 6.221123                                              | 0.004573 | 0.1818643                | 0.0003833 | 0.0044788                | 0.0000488 | 0.5937617                | 0.036392  | 0.0002819                | 0.0000184 | 99.43085                 | 0.1447273 | 34.09668                                            | 0.1199081 | 1068.2 ± 2.8  |
| 58340-01     | Hb 180-150      | 2.925595                                              | 0.003496 | 0.0842561                | 0.0002443 | 0.0025333                | 0.0000373 | 0.2653219                | 0.037228  | 0.0001284                | 0.0000176 | 99.43796                 | 0.2674499 | 34.60961                                            | 0.1601366 | 1080.2 ± 3.8  |
| 58340-02     | Hb 180-150      | 3.957119                                              | 0.003886 | 0.115806                 | 0.000274  | 0.0032116                | 0.0000411 | 0.2881129                | 0.0356603 | 0.0001517                | 0.0000179 | 99.45856                 | 0.2073999 | 34.0489                                             | 0.1344529 | 1067.0 ± 3.2  |
| 58340-03     | Hb 180-150      | 3.183703                                              | 0.003496 | 0.0916371                | 0.0002443 | 0.0030046                | 0.0000373 | 0.2618938                | 0.0364575 | 0.0001159                | 0.0000178 | 99.59456                 | 0.2461714 | 34.67624                                            | 0.1507647 | 1081.8 ± 3.5  |
| 58341-01     | hb150-125       | 1.18392                                               | 0.001706 | 0.0346181                | 0.0001659 | 0.0009709                | 0.0000239 | 0.0729829                | 0.0333694 | 0.000086                 | 0.0000172 | 98.35692                 | 0.527851  | 33.69076                                            | 0.2637075 | 1058.5 ± 6.3  |
| 58341-02     | hb150-125       | 2.310542                                              | 0.003496 | 0.0667119                | 0.0002049 | 0.0018572                | 0.0000239 | 0.1949187                | 0.0350145 | 0.0001259                | 0.0000175 | 99.07298                 | 0.3340819 | 34.38918                                            | 0.1762723 | 1075.1 ± 4.2  |
| 58341-03     | hb150-125       | 2.123485                                              | 0.002629 | 0.0620116                | 0.0002049 | 0.0016112                | 0.0000282 | 0.1707794                | 0.0350308 | 0.0001133                | 0.0000175 | 99.07422                 | 0.3295575 | 33.99677                                            | 0.1814233 | 1065.8 ± 4.3  |
| 58342-01     | Hb 125-106      | 1.28508                                               | 0.001706 | 0.0366471                | 0.0001562 | 0.0010782                | 0.0000273 | 0.0792961                | 0.0337034 | 0.0000884                | 0.0000175 | 98.46991                 | 0.4915878 | 34.58594                                            | 0.2498175 | 1079.7 ± 5.9  |
| 58342-02     | Hb 125-106      | 1.803692                                              | 0.002159 | 0.0526294                | 0.0001756 | 0.0014379                | 0.0000273 | 0.1126906                | 0.0358196 | 0.0000806                | 0.0000172 | 99.18865                 | 0.3659385 | 34.04821                                            | 0.1922442 | 1067.0 ± 4.5  |
| 58342-03     | Hb 125-106      | 1.692974                                              | 0.001975 | 0.0492724                | 0.0001756 | 0.0012229                | 0.0000239 | 0.1620248                | 0.034398  | 0.0000882                | 0.0000172 | 99.23151                 | 0.3804295 | 34.18011                                            | 0.201634  | 1070.1 ± 4.8  |
| 58343-01     | Hb 106-85       | 2.820579                                              | 0.003302 | 0.0814227                | 0.000274  | 0.0023623                | 0.0000318 | 0.1837503                | 0.0344135 | 0.0001225                | 0.0000179 | 99.2472                  | 0.2699154 | 34.43874                                            | 0.1711467 | 1076.2 ± 4.0  |
| 58343-02     | Hb 106-85       | 1.658324                                              | 0.001975 | 0.0476027                | 0.0001951 | 0.0011972                | 0.0000273 | 0.1014763                | 0.0344447 | 0.0000911                | 0.0000172 | 98.8727                  | 0.3888351 | 34.49923                                            | 0.2184363 | 1077.6 ± 5.1  |
| 58343-03     | Hb 106-85       | 3.099369                                              | 0.003399 | 0.090883                 | 0.0002542 | 0.0018981                | 0.0000318 | 0.1366833                | 0.0344608 | 0.0001181                | 0.0000176 | 99.2313                  | 0.2464992 | 33.87869                                            | 0.1507905 | 1063.0 ± 3.6  |
| 58344-01     | Hb 85-74        | 1.226439                                              | 0.001706 | 0.0358898                | 0.0001756 | 0.0009916                | 0.0000214 | 0.0962933                | 0.0359185 | 0.0000798                | 0.0000174 | 98.71483                 | 0.5200455 | 33.80141                                            | 0.2651638 | 1061.2 ± 6.3  |
| 58344-02     | Hb 85-74        | 1.151242                                              | 0.001706 | 0.0333036                | 0.0001659 | 0.0008623                | 0.0000247 | 0.0594623                | 0.0352361 | 0.000071                 | 0.0000173 | 98.59956                 | 0.5494205 | 34.12962                                            | 0.2771774 | 1068.9 ± 6.6  |
| 58344-03     | Hb 85-74        | 1.078411                                              | 0.001884 | 0.0311925                | 0.0001562 | 0.0008881                | 0.0000256 | 0.1205943                | 0.0352521 | 0.0001075                | 0.0000172 | 97.95618                 | 0.5933551 | 33.96525                                            | 0.2885206 | 1065.0 ± 6.8  |
| 58345-01     | Hb 74-63        | 2.434658                                              | 0.002915 | 0.0679714                | 0.0002246 | 0.0019356                | 0.0000291 | 0.1660576                | 0.0360137 | 0.0002779                | 0.0000182 | 97.18072                 | 0.3026444 | 34.87308                                            | 0.1844225 | 1086.4 ± 4.3  |
| 58345-02     | Hb 74-63        | 0.9387424                                             | 0.001618 | 0.026798                 | 0.0001659 | 0.0007052                | 0.0000239 | 0.0529505                | 0.0352995 | 0.0000576                | 0.0000173 | 98.64654                 | 0.6700279 | 34.60748                                            | 0.3407578 | 1080.2 ± 8.0  |
| 58345-03     | Hb 74-63        | 1.79835                                               | 0.001706 | 0.0519501                | 0.0001951 | 0.0015447                | 0.0000264 | 0.1823229                | 0.0353159 | 0.000144                 | 0.0000174 | 98.45425                 | 0.3534202 | 34.1722                                             | 0.2027754 | 1069.9 ± 4.8  |
| 58346-01     | hb 63-53        | 1.66254                                               | 0.001706 | 0.0471194                | 0.0002147 | 0.0013759                | 0.0000273 | 0.1188064                | 0.0346304 | 0.0001936                | 0.0000175 | 97.1404                  | 0.3827474 | 34.33968                                            | 0.2320599 | 1073.9 ± 5.5  |
| 58346-02     | hb 63-53        | 1.657875                                              | 0.001794 | 0.0477793                | 0.0001951 | 0.0013198                | 0.0000256 | 0.1337949                | 0.0361111 | 0.000201                 | 0.0000178 | 97.07026                 | 0.3935721 | 33.75314                                            | 0.2197168 | 1060.0 ± 5.2  |
| 58346-03     | hb 63-53        | 1.779923                                              | 0.002158 | 0.0512328                | 0.0002147 | 0.0013425                | 0.0000247 | 0.2026996                | 0.0353794 | 0.000232                 | 0.0000178 | 97.0664                  | 0.3768779 | 33.82369                                            | 0.2173572 | 1061.7 ± 5.2  |
| 58347-01     | Hb 53-38        | 8.391242                                              | 0.006253 | 0.239683                 | 0.000583  | 0.0064795                | 0.0000536 | 0.7638333                | 0.03954   | 0.0008537                | 0.0000194 | 97.72928                 | 0.1317513 | 34.29713                                            | 0.1300914 | 1072.9 ± 3.1  |
| 58347-02     | Hb 53-38        | 5.332848                                              | 0.004474 | 0.1526214                | 0.0003335 | 0.0042823                | 0.0000411 | 0.4182626                | 0.037     | 0.000456                 | 0.0000184 | 98.10934                 | 0.1667645 | 34.35188                                            | 0.1287059 | 1074.2 ± 3.0  |
| 58347-04     | Hb 53-38        | 0.1338108                                             | 0.001015 | 0.0037837                | 0.0000751 | 0.0000998                | 0.0000184 | -0.0604406               | 0.034114  | 0.0000216                | 0.0000172 | 91.64298                 | 4.43439   | 32.02016                                            | 1.767722  | 1018.4 ± 43.0 |
| 58347-05     | Hb 53-38        | 6.290252                                              | 0.005164 | 0.1814868                | 0.0003634 | 0.004997                 | 0.0000478 | 0.5096652                | 0.0362879 | 0.0005163                | 0.0000194 | 98.23088                 | 0.155491  | 34.11848                                            | 0.1217773 | 1068.7 ± 2.9  |
| 58347-06     | Hb 53-38        | 7.423747                                              | 0.004868 | 0.2106282                | 0.0003833 | 0.0058484                | 0.0000575 | 0.6527112                | 0.0370996 | 0.0010515                | 0.00002   | 96.52559                 | 0.1287163 | 34.10076                                            | 0.1200396 | 1068.3 ± 2.8  |
| 58348-01     | Hb 38-34        | 2.447545                                              | 0.003398 | 0.0668098                | 0.0002147 | 0.0020008                | 0.0000291 | 0.1654052                | 0.0348639 | 0.000569                 | 0.0000188 | 93.67992                 | 0.3192253 | 34.38319                                            | 0.1909058 | 1074.9 ± 4.5  |

|                            |          |           |          |            |           |           |           |            |           |            |           |           |           |           |           |              |
|----------------------------|----------|-----------|----------|------------|-----------|-----------|-----------|------------|-----------|------------|-----------|-----------|-----------|-----------|-----------|--------------|
| 58349-01                   | Hb 34-28 | 3.088635  | 0.003011 | 0.0879852  | 0.0002344 | 0.0023819 | 0.0000318 | 0.2205856  | 0.03715   | 0.0004104  | 0.0000184 | 96.65265  | 0.2437096 | 33.99305  | 0.1556929 | 1065.7 ± 3.7 |
| 58349-02                   | Hb 34-28 | 2.416923  | 0.003788 | 0.0686377  | 0.0002147 | 0.0018268 | 0.0000318 | 0.1904125  | 0.0388784 | 0.0002629  | 0.0000178 | 97.42362  | 0.3370274 | 34.37733  | 0.1822005 | 1074.8 ± 4.3 |
| 58349-03                   | Hb 34-28 | 2.879343  | 0.003886 | 0.0805559  | 0.0002246 | 0.0023248 | 0.0000309 | 0.2543447  | 0.0356341 | 0.0004484  | 0.0000186 | 96.11302  | 0.287088  | 34.436    | 0.1678592 | 1076.2 ± 4.0 |
| 58349-04                   | Hb 34-28 | 4.311635  | 0.003886 | 0.1215828  | 0.0003037 | 0.0034589 | 0.0000327 | 0.3193662  | 0.0372173 | 0.0006275  | 0.0000194 | 96.30029  | 0.196795  | 34.21814  | 0.1446512 | 1071.0 ± 3.4 |
| 58349-05                   | Hb 34-28 | 3.303788  | 0.003788 | 0.0947649  | 0.0003236 | 0.0031231 | 0.0000555 | 0.2484458  | 0.0372347 | 0.0007213  | 0.0000213 | 94.1612   | 0.2646736 | 32.89226  | 0.175166  | 1039.5 ± 4.2 |
| 58350-01                   | Hb 28-22 | 1.572752  | 0.001705 | 0.0452969  | 0.0001951 | 0.0012466 | 0.0000273 | 0.1372221  | 0.0343304 | 0.00026    | 0.0000175 | 95.82088  | 0.4029204 | 33.34601  | 0.2269925 | 1050.3 ± 5.4 |
| 58350-02                   | Hb 28-22 | 2.453947  | 0.002628 | 0.068804   | 0.0002246 | 0.0019069 | 0.0000264 | 0.1500505  | 0.0357609 | 0.0004226  | 0.0000185 | 95.40859  | 0.2929266 | 34.08398  | 0.1825206 | 1067.9 ± 4.3 |
| 58350-03                   | Hb 28-22 | 2.641221  | 0.003011 | 0.0786728  | 0.0002049 | 0.002181  | 0.0000364 | 0.1785918  | 0.0365336 | 0.0004349  | 0.0000182 | 95.68418  | 0.2822305 | 32.17812  | 0.1556223 | 1022.2 ± 3.8 |
| 58351-01                   | Hb 22-15 | 2.338003  | 0.002723 | 0.0681749  | 0.0002246 | 0.0018863 | 0.00003   | 0.1525151  | 0.0344214 | 0.0004344  | 0.0000184 | 95.03976  | 0.3080093 | 32.64791  | 0.1786813 | 1033.6 ± 4.3 |
| 58351-02                   | Hb 22-15 | 1.197241  | 0.001883 | 0.031831   | 0.0001465 | 0.000951  | 0.0000264 | 0.0519486  | 0.0342634 | 0.0003387  | 0.0000179 | 91.99573  | 0.5433657 | 34.64408  | 0.2893949 | 1081.1 ± 6.8 |
| 58352-01                   | Hb 15-10 | 5.33584   | 0.004474 | 0.1489233  | 0.0003335 | 0.0041647 | 0.0000449 | 0.4706058  | 0.0391244 | 0.0008086  | 0.0000194 | 96.23513  | 0.1704899 | 34.56283  | 0.1364821 | 1079.1 ± 3.2 |
| 58352-02                   | Hb 15-10 | 3.734775  | 0.004277 | 0.10901    | 0.0002839 | 0.0029649 | 0.0000373 | 0.3429256  | 0.0366189 | 0.0005144  | 0.0000189 | 96.6721   | 0.2340127 | 33.19937  | 0.1466949 | 1046.8 ± 3.5 |
| 58352-03                   | Hb 15-10 | 3.416966  | 0.003495 | 0.0953265  | 0.0002443 | 0.0026882 | 0.0000364 | 0.2256772  | 0.0358921 | 0.0006604  | 0.0000189 | 94.82529  | 0.233086  | 34.05058  | 0.1557124 | 1067.1 ± 3.7 |
| <i>J=0.02365 ± 0.00006</i> |          |           |          |            |           |           |           |            |           |            |           |           |           |           |           |              |
| 58358-01                   | Hb 10-5  | 0.0913026 | 0.000941 | 0.0021441  | 0.0000694 | 0.0000699 | 0.0000164 | 0.0178052  | 0.0344685 | 0.0000533  | 0.0000171 | 84.3009   | 6.457576  | 36.12502  | 3.218524  | -            |
| 58358-02                   | Hb 10-5  | 0.0016256 | 0.000837 | 2.67E-06   | 0.0000523 | 2.76E-06  | 0.0000154 | -0.0256871 | 0.033706  | 4.52E-06   | 0.0000167 | -108.227  | 354.9037  | -79.28257 | 295.7764  | -            |
| 58358-03                   | Hb 10-5  | 0.0122534 | 0.00085  | 0.0000417  | 0.0000501 | -5.79E-07 | 0.0000149 | 0.0361831  | 0.0346074 | 0.0000442  | 0.000017  | 16.85635  | 47.33067  | 145.7818  | 817.8657  | -            |
| 58358-04                   | Hb 10-5  | 0.376299  | 0.001287 | 0.0054129  | 0.0000844 | 0.000289  | 0.0000184 | -0.018002  | 0.0352882 | 0.0011906  | 0.0000194 | 6.121838  | 1.737562  | 4.245096  | 1.36874   | -            |
| 58358-05                   | Hb 10-5  | 0.0102905 | 0.000871 | 0.0002216  | 0.0000529 | 9.74E-06  | 0.0000153 | -0.0381219 | 0.0353047 | -0.000023  | 0.0000167 | 136.5982  | 57.13853  | 56.10246  | 29.09492  | -            |
| 58358-06                   | Hb 10-5  | 0.0014668 | 0.000844 | -0.0000334 | 0.0000517 | 6.22E-06  | 0.0000145 | 0.0114314  | 0.0346687 | -0.0000134 | 0.0000168 | 431.4639  | 464.1169  | -150.5393 | 225.6422  | -            |
| 58358-07                   | Hb 10-5  | 0.0099497 | 0.000863 | 0.0000058  | 0.0000517 | 0.0000238 | 0.0000153 | -0.0003156 | 0.034011  | 0.0000384  | 0.000017  | -14.41025 | 58.16085  | -24.62467 | 97.28331  | -            |
| 58358-8                    | Hb 10-5  | 5.419777  | 0.003788 | 0.1515902  | 0.0002938 | 0.0043108 | 0.0000507 | 0.4259797  | 0.0395572 | 0.0008368  | 0.0000194 | 96.07445  | 0.1561598 | 34.42214  | 0.1291047 | 1074.6 ± 3.0 |
| 58358-09                   | Hb 10-5  | 16.58294  | 0.007743 | 0.4659178  | 0.0008633 | 0.0130923 | 0.000084  | 1.409516   | 0.0478048 | 0.002021   | 0.0000219 | 97.08664  | 0.0804266 | 34.63398  | 0.1161278 | 1079.6 ± 2.7 |
| 58358-10                   | Hb 10-5  | 13.4143   | 0.006947 | 0.3780293  | 0.0007932 | 0.0107585 | 0.0000702 | 1.137645   | 0.0434916 | 0.0016453  | 0.0000219 | 97.06232  | 0.0917861 | 34.52064  | 0.121784  | 1076.9 ± 2.9 |
| 58358-11                   | Hb 10-5  | 6.705653  | 0.005263 | 0.1984077  | 0.0003833 | 0.0053558 | 0.0000536 | 0.5583624  | 0.0405561 | 0.0008153  | 0.0000194 | 97.08114  | 0.1485827 | 32.88046  | 0.1183606 | 1038.0 ± 2.8 |
| 58358-12                   | Hb 10-5  | 6.705102  | 0.005461 | 0.1929674  | 0.0003335 | 0.0052776 | 0.0000497 | 0.4853707  | 0.0415363 | 0.0008298  | 0.0000194 | 96.93008  | 0.1520409 | 33.74443  | 0.1185126 | 1058.6 ± 2.8 |
| 58358-13                   | Hb 10-5  | 6.2088    | 0.004967 | 0.1740692  | 0.0003236 | 0.0049523 | 0.000043  | 0.4978619  | 0.0379201 | 0.0008682  | 0.0000194 | 96.5176   | 0.1541135 | 34.50073  | 0.1252117 | 1076.4 ± 2.9 |
| 58358-14                   | Hb 10-5  | 4.840019  | 0.004474 | 0.1357444  | 0.0003037 | 0.0039062 | 0.0000449 | 0.3400346  | 0.0349768 | 0.0005458  | 0.0000187 | 97.23855  | 0.1831733 | 34.7362   | 0.1357189 | 1082.0 ± 3.2 |
| 58359-01                   | Hb 5-    | 0.3223009 | 0.001167 | 0.0101943  | 0.0000951 | 0.0002699 | 0.0000198 | -0.0062394 | 0.0344468 | 0.0001269  | 0.0000173 | 88.21645  | 1.867638  | 27.87659  | 0.6808599 | 913.7 ± 17.5 |
| 58359-02                   | Hb 5-    | 0.2982903 | 0.001159 | 0.008354   | 0.0000897 | 0.0002357 | 0.0000177 | 0.0317517  | 0.0353978 | 0.0002449  | 0.0000174 | 76.59082  | 2.031569  | 27.42638  | 0.8363169 | 902.1 ± 21.6 |

## Age spectrum

|                            |          |           |          |            |           |            |           |            |           |            |           |          |           |           |           |                |
|----------------------------|----------|-----------|----------|------------|-----------|------------|-----------|------------|-----------|------------|-----------|----------|-----------|-----------|-----------|----------------|
| <i>J=0.02369 ± 0.00006</i> |          |           |          |            |           |            |           |            |           |            |           |          |           |           |           |                |
| 58347-07A                  | Hb 53-38 | 0.0008527 | 0.000837 | -8.21E-06  | 0.0000536 | 5.50E-06   | 0.0000158 | 0.0089746  | 0.0351011 | 5.10E-06   | 0.0000167 | 7.376255 | 675.4329  | -4.184768 | 378.2805  | -              |
| 58347-07B                  | Hb 53-38 | 0.0002588 | 0.000851 | -8.21E-06  | 0.0000517 | -0.0000147 | 0.0000155 | -0.0234859 | 0.0358738 | -0.0000116 | 0.0000169 | 700.4937 | 3220.91   | 188.0515  | 1385.188  | -              |
| 58347-07C                  | Hb 53-38 | 0.0004993 | 0.000864 | -0.0000163 | 0.0000512 | -0.000022  | 0.0000144 | -0.0259526 | 0.0352126 | -0.0000193 | 0.0000169 | 827.8794 | 1845.571  | 1213.553  | 19569.85  | -              |
| 58347-07D                  | Hb 53-38 | 0.001597  | 0.000846 | 0.0000103  | 0.0000517 | -8.12E-06  | 0.0000153 | 0.0145008  | 0.034847  | -0.0000156 | 0.0000168 | 461.0403 | 436.3497  | -9717.983 | 612867.8  | -              |
| 58347-07E                  | Hb 53-38 | 0.0014291 | 0.000856 | 0.000018   | 0.0000485 | -7.29E-06  | 0.0000154 | 0.0107704  | 0.0351936 | -0.0000309 | 0.0000168 | 799.6816 | 627.1085  | 1169.132  | 7013.206  | -              |
| 58347-07F                  | Hb 53-38 | 0.0358481 | 0.000876 | 0.0007322  | 0.0000596 | 0.0000205  | 0.0000164 | -0.0476857 | 0.0359521 | 4.00E-08   | 0.0000169 | 89.35996 | 16.45419  | 41.68832  | 9.067169  | 1239.3 ± 195.0 |
| 58347-07G                  | Hb 53-38 | 0.1635167 | 0.000978 | 0.0045166  | 0.0000751 | 0.0001049  | 0.0000163 | -0.0555056 | 0.036697  | 3.91E-06   | 0.000017  | 96.59166 | 3.660222  | 34.64505  | 1.53363   | 1081.1 ± 36.0  |
| 58347-07H                  | Hb 53-38 | 4.125763  | 0.004181 | 0.118262   | 0.0002839 | 0.0033777  | 0.0000383 | 0.3130845  | 0.0420372 | 0.0003187  | 0.0000181 | 98.33358 | 0.2108022 | 34.37373  | 0.1401649 | 1074.7 ± 3.3   |
| 58347-07I                  | Hb 53-38 | 3.100117  | 0.0034   | 0.089967   | 0.000274  | 0.002467   | 0.0000345 | 0.2522394  | 0.0383774 | 0.0001964  | 0.0000178 | 98.78681 | 0.2515371 | 34.11231  | 0.1601947 | 1068.5 ± 3.8   |
| 58347-07J                  | Hb 53-38 | 2.519097  | 0.003013 | 0.0733112  | 0.0001951 | 0.0020402  | 0.00003   | 0.2112685  | 0.0367948 | 0.0001648  | 0.0000178 | 98.7466  | 0.2939453 | 34.00477  | 0.1602782 | 1066.0 ± 3.8   |
| 58347-07K                  | Hb 53-38 | 2.29237   | 0.00311  | 0.0662954  | 0.0002542 | 0.001804   | 0.0000247 | 0.1439361  | 0.0368271 | 0.0001622  | 0.0000177 | 98.41961 | 0.3259988 | 34.08716  | 0.1937506 | 1067.9 ± 4.6   |

|                            |          |           |          |           |           |            |           |            |           |           |           |          |           |          |           |               |
|----------------------------|----------|-----------|----------|-----------|-----------|------------|-----------|------------|-----------|-----------|-----------|----------|-----------|----------|-----------|---------------|
| 58347-07L                  | Hb 53-38 | 3.555665  | 0.003498 | 0.1033038 | 0.0002641 | 0.0029372  | 0.0000355 | 0.317022   | 0.0393124 | 0.0002906 | 0.0000182 | 98.3068  | 0.2247249 | 33.9151  | 0.1448346 | 1063.9 ± 3.4  |
| 58347-07M                  | Hb 53-38 | 1.520887  | 0.00198  | 0.0457685 | 0.0001853 | 0.0012244  | 0.0000318 | 0.1306259  | 0.0349695 | 0.0000931 | 0.0000173 | 98.88708 | 0.4265511 | 32.93085 | 0.2157122 | 1040.4 ± 5.2  |
| <i>J=0.02365 ± 0.00006</i> |          |           |          |           |           |            |           |            |           |           |           |          |           |          |           |               |
| 58358-09A                  | Hb 10-5  | 0.001072  | 0.000849 | -0.000024 | 0.0000517 | -0.0000269 | 0.0000153 | -0.0421803 | 0.0348055 | -0.000021 | 0.0000166 | 363.8566 | 607.0696  | 485.0534 | 3557.865  | -             |
| 58358-09B                  | Hb 10-5  | 0.1157105 | 0.000913 | 0.0029813 | 0.0000768 | 0.0000847  | 0.0000164 | -0.0313799 | 0.0351239 | 0.0000401 | 0.000017  | 87.59561 | 5.091287  | 33.72728 | 2.285337  | 1058.2 ± 54.2 |
| 58358-09C                  | Hb 10-5  | 0.1732925 | 0.001058 | 0.0049505 | 0.0000801 | 0.0001684  | 0.000017  | -0.0203007 | 0.035217  | 0.0000182 | 0.0000169 | 95.98246 | 3.426032  | 33.49389 | 1.393797  | 1052.6 ± 33.2 |
| 58358-09D                  | Hb 10-5  | 0.6982791 | 0.001377 | 0.0193957 | 0.000137  | 0.0005988  | 0.0000206 | 0.0867336  | 0.0370383 | 0.0000824 | 0.0000171 | 97.51597 | 0.8863589 | 35.2264  | 0.4361072 | 1093.4 ± 10.2 |
| 58358-09E                  | Hb 10-5  | 0.8729623 | 0.001542 | 0.0243456 | 0.000137  | 0.0006598  | 0.0000222 | 0.0560781  | 0.0355037 | 0.0001006 | 0.0000173 | 97.11733 | 0.71622   | 34.88383 | 0.3496151 | 1085.4 ± 8.2  |
| 58358-09F                  | Hb 10-5  | 0.2880896 | 0.001086 | 0.0081441 | 0.0000933 | 0.0002471  | 0.0000191 | -0.037429  | 0.0349741 | 0.0000257 | 0.0000171 | 96.33553 | 2.079036  | 33.95842 | 0.8806807 | 1063.7 ± 20.8 |
| 58358-09G                  | Hb 10-5  | 0.6203465 | 0.001301 | 0.0178247 | 0.0001087 | 0.0005097  | 0.0000206 | 0.0058596  | 0.0351721 | 0.0000639 | 0.0000171 | 97.04144 | 0.9792142 | 33.78073 | 0.4273778 | 1059.4 ± 10.1 |
| 58358-09H                  | Hb 10-5  | 1.835617  | 0.001983 | 0.0522261 | 0.0002049 | 0.0014345  | 0.0000256 | 0.1426148  | 0.0371223 | 0.0001915 | 0.0000175 | 97.54591 | 0.3602876 | 34.35556 | 0.2108396 | 1073.0 ± 5.0  |
| 58358-09I                  | Hb 10-5  | 1.112107  | 0.001806 | 0.0328403 | 0.0001465 | 0.000876   | 0.0000247 | 0.0191518  | 0.0357611 | 0.0000956 | 0.0000173 | 97.60615 | 0.5766652 | 33.06737 | 0.2667912 | 1042.4 ± 6.4  |
| 58358-09J                  | Hb 10-5  | 0.7012983 | 0.001464 | 0.0201409 | 0.0001275 | 0.0005466  | 0.0000198 | 0.0933218  | 0.0372038 | 0.0000835 | 0.0000173 | 97.55241 | 0.8941825 | 34.08676 | 0.4080178 | 1066.7 ± 9.6  |

## Electronic Annex 2
